1 **Ecological and evolutionary drivers of hemoplasma infection and bacterial genotype**  
2 **sharing in a Neotropical bat community**

3

4 Daniel J. Becker<sup>1,2\*</sup>, Kelly A. Speer<sup>3</sup>, Alexis M. Brown<sup>4</sup>, M. Brock Fenton<sup>5</sup>, Alex D.  
5 Washburne<sup>6</sup>, Sonia Altizer<sup>2,7</sup>, Daniel G. Streicker<sup>7-9</sup>, Raina K. Plowright<sup>6</sup>, Vladimir E.  
6 Chizhikov<sup>10§</sup>, Nancy B. Simmons<sup>3,11</sup>, Dmitriy V. Volokhov<sup>10</sup>

7

8 <sup>1</sup>Department of Biology, Indiana University, Bloomington, IN, USA

9 <sup>2</sup>Center for the Ecology of Infectious Disease, University of Georgia, Athens, GA, USA

10 <sup>3</sup>Richard Gilder Graduate School, American Museum of Natural History, New York, NY, USA

11 <sup>4</sup>Department of Ecology and Evolution, Stony Brook University, Stony Brook, NY, USA

12 <sup>5</sup>Department of Biology, Western University, London, Ontario, Canada

13 <sup>6</sup>Department of Microbiology and Immunology, Montana State University, Bozeman, MT USA

14 <sup>7</sup>Odum School of Ecology, University of Georgia, Athens, GA USA

15 <sup>8</sup>MRC–University of Glasgow Centre for Virus Research, Glasgow, United Kingdom

16 <sup>9</sup>Institute of Biodiversity, Animal Health and Comparative Medicine, University of Glasgow,  
17 United Kingdom

18 <sup>10</sup>Center for Biologics Evaluation and Research, Food and Drug Administration, Silver Spring,  
19 MD, USA

20 <sup>11</sup>Department of Mammalogy, Division of Vertebrate Zoology, American Museum of Natural  
21 History, New York, NY

22 \*Corresponding author, [danbeck@iu.edu](mailto:danbeck@iu.edu)

23 §Currently retired

24 **Running head:** Ecology and evolution of bat hemoplasmas

25 **Keywords:** 16S rRNA; cophylogeny; host shifts; parasite sharing; bacterial zoonosis; host

26 specificity

27

28 **Abstract**

29 Most emerging pathogens can infect multiple species, underscoring the importance of  
30 understanding the ecological and evolutionary factors that allow some hosts to harbor greater  
31 infection prevalence and share pathogens with other species. Investigating such factors can  
32 inform surveillance efforts and help forecast disease emergence. However, our understanding of  
33 pathogen jumps is primarily based around viruses, despite bacteria accounting for the greatest  
34 proportion of zoonoses. Because bacterial pathogens in bats (Order: Chiroptera) can have  
35 conservation and human health consequences, studies that examine the ecological and  
36 evolutionary drivers of bacterial prevalence and barriers to pathogen sharing are crucially  
37 needed. We here studied hemotropic *Mycoplasma* spp. (i.e., hemoplasmas) across a species-rich  
38 bat community in Belize over two years. Across 469 bats spanning 33 species, half of individuals  
39 and two-thirds of species were hemoplasma positive. Infection prevalence was higher for males,  
40 heavier species, and those with larger colony sizes. Hemoplasmas displayed high genetic  
41 diversity (21 novel genotypes) and strong host specificity. Evolutionary patterns supported co-  
42 divergence of bats and bacterial genotypes alongside phylogenetically constrained host shifts.  
43 Bat species centrality to the network of shared hemoplasma genotypes was phylogenetically  
44 clustered and unrelated to prevalence, further suggesting rare—but detectable—bacterial sharing  
45 between species. Our study highlights the importance of using fine phylogenetic scales when  
46 assessing host specificity and suggests phylogenetic similarity may play a key role in host shifts  
47 for not only viruses but also bacteria. Such work more broadly contributes to increasing efforts to  
48 understand cross-species transmission and epidemiological consequences of bacterial pathogens.

## 49 **Introduction**

50 Most pathogens that cause disease in humans, domestic animals, and wildlife are capable of  
51 infecting multiple host species (Woolhouse, Taylor, & Haydon, 2001). However, predicting  
52 which hosts maintain pathogens and identifying their role in disease emergence can be  
53 challenging, as many hosts can be infected but not play key roles in the reservoir community  
54 (Fenton, Streicker, Petchey, & Pedersen, 2015; Viana et al., 2014). Pathogen jumps between  
55 species depends on infection prevalence in the donor host, transmission opportunities between  
56 donor and recipient species, and suitability of the recipient host for pathogen replication (Parrish  
57 et al., 2008; Plowright et al., 2017). Each of these steps can be shaped by ecological and  
58 evolutionary factors (Nishiura, Hoyo, Klaassen, Bauer, & Heesterbeek, 2009; VanderWaal &  
59 Ezenwa, 2016). For example, small-bodied species can have greater competence, the ability to  
60 transmit new infections, than larger species (Downs, Schoenle, Han, Harrison, & Martin, 2019),  
61 and host switching is commonly constrained by phylogeny, owing to similarity in immunological  
62 barriers to pathogen replication between related species (Streicker et al., 2010). Understanding  
63 the ecological and evolutionary factors that allow some species to harbor greater prevalence and  
64 have facilitated pathogen sharing could thus guide wildlife surveillance and forecast emergence  
65 (Fountain-Jones et al., 2018). Further, examining associations between hosts and pathogens can  
66 uncover factors favoring host shifts versus evolutionary codivergence, which is a key requisite  
67 for generating such predictions (Geoghegan, Duchêne, & Holmes, 2017; Lei & Olival, 2014).

68         Given the public health and agricultural burdens of many zoonotic pathogens such as  
69 avian influenza virus and rabies virus, most investigations of the determinants of pathogen  
70 prevalence and emergence focus on viruses (Geoghegan et al., 2017; Luis et al., 2015; Olival et  
71 al., 2017). However, more zoonoses are caused by bacteria than other pathogen taxa (Han,

72 Kramer, & Drake, 2016), and bacterial pathogens can negatively impact newly infected host  
73 species (e.g., *Mycoplasma gallisepticum*, a poultry pathogen, caused rapid population declines  
74 in wild house finches; Hochachka & Dhondt, 2000). More attention to bacteria and their  
75 propensity for host specificity versus generalism is accordingly important for understanding  
76 whether factors that govern cross-species transmission of viruses can be extended to other  
77 pathogens (Bonneaud, Weinert, & Kuijper, 2019). Bacterial pathogens have been especially  
78 understudied for bats (Lei & Olival, 2014; Mühldorfer, 2013), in contrast to intensive studies of  
79 zoonotic viruses (Drexler et al., 2012; Luis et al., 2015). Yet many bacterial pathogens are likely  
80 important to bat conservation and human health due to pathogenic effects on bats themselves and  
81 their zoonotic potential (Becker et al., 2018; Evans, Bown, Timofte, Simpson, & Birtles, 2009).

82 To determine the ecological and evolutionary drivers of bacterial prevalence and barriers  
83 to pathogen sharing, we focused on hemotropic *Mycoplasma* spp. (i.e., hemoplasmas) in a  
84 species-rich bat community in Belize (Fenton et al., 2001; Herrera, Duncan, Clare, Fenton, &  
85 Simmons, 2018). The Neotropics have remarkable bat diversity owing to adaptive radiation in  
86 the Phyllostomidae (Gunnell & Simmons, 2012), producing a range of feeding strategies (e.g.,  
87 frugivory, carnivory, sanguivory), body sizes, and roosting preferences (Monteiro & Nogueira,  
88 2011; Wetterer, Rockman, & Simmons, 2000). Hemoplasmas are intracellular erythrocytic  
89 bacteria transmitted by direct contact (Cohen et al., 2018; Museux et al., 2009) and also possibly  
90 arthropod vectors (Willi, Boretti, Meli, et al., 2007). Hemoplasmas can cause acute and chronic  
91 anemia, especially for immunocompromised hosts; however, many animals develop inapparent  
92 infections and are asymptomatic (Messick, 2004). As *Mycoplasma* spp. lack many of the  
93 metabolic pathways associated with energy production and synthesis of cell components found in  
94 other bacteria, they are fully dependent on host cells (Citti & Blanchard, 2013). Hemoplasmas

95 have therefore been described as mostly host specialists (Pitcher & Nicholas, 2005), yet  
96 interspecies and potentially zoonotic transmission can occur (Maggi et al., 2013; Willi, Boretti,  
97 Tasker, et al., 2007). Hemoplasmas are common and genetically diverse in bats (Ikeda et al.,  
98 2017; Millán et al., 2019; Volokhov et al., 2017), which offers an ideal system for identifying the  
99 ecological and evolutionary factors structuring bacterial infection within and between species.

100 Many cross-species comparisons of pathogen infection risks and sharing have used less-  
101 diverse host communities (Johnson et al., 2012; VanderWaal, Atwill, Isbell, & McCowan, 2014)  
102 or global datasets of host–pathogen associations that can be limited by heterogeneous sampling  
103 effort and variation in pathogen detection methods (Dallas et al., 2019; Huang, Bininda-Emonds,  
104 Stephens, Gittleman, & Altizer, 2014). Our focus on a widespread pathogens group in a highly  
105 diverse host community allowed us to capitalize on strong host trait variation while controlling  
106 for sampling effort and diagnostics methods (Becker, Crowley, Washburne, & Plowright, 2019;  
107 Han, Kramer, et al., 2016). Past work has also used host–pathogen networks to characterize  
108 contemporary or historic transmission at often coarse taxonomic scales (e.g., pathogen species  
109 complexes or genera; Blyton, Banks, Peakall, Lindenmayer, & Gordon, 2014; VanderWaal et al.,  
110 2014). However, because bat species can be infected by multiple hemoplasma genotypes, and  
111 because genotypes with  $\geq 99\%$  sequence identity of their 16S rRNA genes can represent different  
112 species (Volokhov, Hwang, Chizhikov, Danaceau, & Gottdenker, 2017; Volokhov, Simonyan,  
113 Davidson, & Chizhikov, 2012), focusing on pathogen genotypes provides finer-scale resolution  
114 in identifying the ecological and evolutionary features of species that facilitate pathogen sharing  
115 and to identify likely maintenance hosts of bacterial infections (Fountain-Jones et al., 2018).

116 We asked three questions about the relative contribution of ecological traits and  
117 evolutionary history to structuring infection patterns and pathogen sharing. First, what are the

118 individual and ecological predictors of hemoplasma infection in bats? Second, does the  
119 distribution of hemoplasma genotypes across the bat community map onto the bat phylogeny, as  
120 might be predicted by host–pathogen codivergence? Lastly, if genotype sharing between host  
121 species occurs, which host clades or traits best predict network centrality? We predicted that  
122 ecological covariates such as ectoparasitism and large host colonies could increase bacteria risk  
123 through vector-borne or density-dependent transmission (McCallum, Barlow, & Hone, 2001;  
124 Willi, Boretti, Meli, et al., 2007). We also expected hemoplasma genotypes would be specific to  
125 particular host species but that more closely related bats would share hemoplasma genotypes,  
126 indicating phylogenetically restricted host shifts (Pitcher & Nicholas, 2005). However, host traits  
127 that increase the risk of bacteria exposure, such as occupying a greater diversity of roosts, could  
128 also explain pathogen genotype sharing among less closely related hosts (McKee et al., 2019).

129

## 130 **Methods**

### 131 *Bat capture and sampling*

132 From April 24 to May 6 2017 and from April 23 to May 5 2018, we sampled 469 bats from 33  
133 species captured in two adjacent areas in the Orange Walk District of Belize: Lamanai  
134 Archaeological Reserve (LAR) and Ka'Kabish (KK; Fig. 1). The LAR is bordered by the New  
135 River Lagoon, forest, and agriculture, while KK is a remnant patch of forest surrounded by  
136 agriculture located 10 km away. At least 44 of the 70 bat species in Belize have been recorded in  
137 this region (Herrera et al., 2018; Reid, 1997). Bats were captured with mist nets at the exits of  
138 roosts or along flight paths from 19:00 until 22:00. Harp traps were also set from 18:00 to 05:00.

139 Bats were placed in cloth bags until processing and were identified to species (and sex)  
140 based on morphology (Reid, 1997). Reproductive activity was indicated by the presence of

141 scrotal testes in males and by the evidence of pregnancy or lactation in females. We also visually  
142 screened bats for the presence of ectoparasites (i.e., bat flies, ticks, bat bugs, mites; Ter Hofstede,  
143 Fenton, & Whitaker, 2004). We collected 3–30  $\mu$ L of blood (volumes were dependent on bat  
144 mass) by lancing the propatagial vein with a sterile needle. Blood was collected with heparinized  
145 capillary tubes and stored on Whatman FTA cards to preserve bacterial DNA. Field procedures  
146 followed guidelines for safe and humane handling of bats published by of the American Society  
147 of Mammalogists (Sikes, Care, & Mammalogists, 2016) and were approved by the Institutional  
148 Animal Care and Use Committees of the University of Georgia (A2014 04-016-Y3-A5) and  
149 American Museum of Natural History (AMNHACUC-20170403 and AMNHACUC-  
150 20180123). Fieldwork was authorized by the Belize Forest Department under permits  
151 WL/2/1/17(16), WL/2/1/17(19), and WL/2/1/18(16). Sample size was similar between years  
152 (2017=202, 2018=267) but varied by site (LAR=365, KK=101). More species were sampled for  
153 blood at LAR ( $n=33$ ) than KK ( $n=17$ ; Fig. 1), reflecting site differences in species richness  
154 (Herrera et al., 2018). We sampled 1–139 individuals per bat (the maximum was the common  
155 vampire bat, *Desmodus rotundus*), with a mean of 14 individuals per bat species (Table S1).

156

#### 157 *DNA extraction, PCR amplification, and amplicon sequencing*

158 Genomic DNA was extracted from blood on FTA cards using QIAamp DNA Investigator Kits  
159 (Qiagen). We tested DNA for hemoplasmas using PCR with primers and procedures described in  
160 prior analyses (Volokhov et al., 2017). We included blank FTA punches as an extraction control,  
161 ultrapure water as a negative control, and *Candidatus Mycoplasma haemozalophi* DNA as a  
162 positive control (Volokhov et al., 2011). Amplicons from PCR-positive samples were purified by  
163 electrophoresis and extracted with the QIAquick Gel Extraction Kit (Qiagen).



164 To determine hemoplasma infection status, all 16S rRNA amplicons were directly  
165 sequenced by MacroGen (<https://www.macrogenusa.com/>). Amplicons were sequenced with the  
166 same primers used for PCR amplification and then with internal (walking) primers when needed  
167 (Volokhov et al., 2017). Negative DNA samples were tested for amplification quality using the  
168 universal PCR primers targeting the mammal mitochondrial 16S rRNA gene (Volokhov, Kong,  
169 George, Anderson, & Chizhikov, 2008) or the mitochondrial cytochrome *c* oxidase subunit 1  
170 gene (Clare, Lim, Engstrom, Eger, & Hebert, 2007); all hemoplasma-negative DNA samples  
171 gave positive signal in the mitochondrial 16S rRNA gene- and/or the COI-specific PCR assays.  
172 All amplified sequences were subjected to chimeric sequence analysis using DECIPHER  
173 (Wright, Yilmaz, & Noguera, 2012) and UCHIME (Edgar, Haas, Clemente, Quince, & Knight,  
174 2011). All hemoplasma sequences have been deposited in GenBank under accession numbers  
175 MH245119–MH245194 and MK353807–MK353892; four positive samples were identified as  
176 *Bartonella* spp. during sequencing and were considered hemoplasma negative in our analyses.

177

#### 178 *Bat phylogenetic data*

179 We used the *rotl* and *ape* packages in R to extract a bat phylogeny from the Open Tree of Life  
180 and to calculate branch lengths with Grafen's method (Michonneau, Brown, & Winter, 2016;  
181 Paradis, Claude, & Strimmer, 2004). To assess hemoplasma genotype sharing as a function of  
182 host phylogenetic similarity, we derived pairwise phylogenetic distances between the 33 sampled  
183 bat species (Fig. S1). Because more evolutionarily distinct host species could display less  
184 frequent bacterial genotype sharing owing to ecological and immunological barriers to pathogen  
185 exposure and replication (Huang, Drake, Gittleman, & Altizer, 2015), we used the *picante*  
186 package and our bat phylogeny to derive evolutionary distinctiveness (Kembel et al., 2010).

187

188 *Host species trait data*

189 We obtained species-level data on host traits relevant to pathogen transmission from previously  
190 published sources (Table S2). We obtained fecundity (litter size, litters per year), body mass, and  
191 diet from the Amniote Life History and EltonTraits databases (Myhrvold et al., 2015; Wilman et  
192 al., 2014). For foraging ecology, which could affect bacterial exposure (e.g., trophic interactions;  
193 Kellner et al., 2018), we defined three dietary guilds: frugivory and nectarivory ( $n=11$ ),  
194 insectivory ( $n=18$ ), and carnivory (including sanguivory and piscivory,  $n=4$ ; González-Salazar,  
195 Martínez-Meyer, & López-Santiago, 2014). We also considered the proportion of plant-based  
196 items in diet. We simplified foraging strata into aerial ( $n=14$ ), arboreal ( $n=16$ , including  
197 scansorial), and ground- or aquatic-level foraging ( $n=3$ ). We also expanded prior compilations of  
198 wing aspect ratios and roost preferences to serve as proxies for ecological overlap among species  
199 (Fenton et al., 2001; Herrera et al., 2018; Reid, 1997). Roost type was simplified to open (e.g.,  
200 only foliage;  $n=6$ ) or closed (e.g., hollows, caves;  $n=27$ ), and roost flexibility was simplified to  
201 using one ( $n=16$ ) or multiple roost types ( $n=17$ ). We classified maximum colony sizes as small-  
202 to-medium (e.g., under 100 individuals;  $n=20$ ) or large (e.g., hundreds to thousands;  $n=13$ ; Reid,  
203 1997; Santana, Dial, Eiting, & Alfaro, 2011), as most values were reported in ranges. We did not  
204 record pairwise sympatry (e.g., Luis et al., 2015; McKee et al., 2019) given that all species occur  
205 in Belize (Fig. S2). Yet because more widely distributed species could have more opportunities  
206 for pathogen sharing due to range overlap, we used the *geosphere* package and data from the  
207 International Union for Conservation of Nature to derive geographic range size (Baillie, Hilton-  
208 Taylor, & Stuart, 2004; Hijmans, Williams, Vennes, & Hijmans, 2019). Missing species-level  
209 traits were taken from other databases, primary literature, or closely related species (Table S2).

210

211 *Individual-level analysis of bat infection status*

212 To analyze individual-level data, we used a phylogenetic generalized linear mixed model  
213 (GLMM) to test if hemoplasma infection status varied by sex, reproductive status, year, site, and  
214 ectoparasitism while accounting for bat phylogenetic relatedness. We also included interactions  
215 between sex and reproduction and between site and year. As vampire bats were banded for a  
216 mark–recapture study (Volokhov et al., 2017) and some were sampled between and within years  
217 ( $n=14$ ), we randomly selected one of each recapture. After removing recaptures and missing  
218 values (remaining  $n=323$ ), we fit the phylogenetic GLMM using the *brms* package, default  
219 priors, and infection status as a Bernoulli-distributed response. We included random effects for  
220 bat species and phylogeny, the latter of which used the phylogenetic covariance matrix (Bürkner,  
221 2017). We ran four chains for 20,000 iterations with a burn-in period of 10,000, thinned every 10  
222 steps, for a total 4,000 samples. We estimated fixed effects (means and 95% highest density  
223 intervals [HDI]) from the posterior distributions of each predictor alongside a Bayesian  $R^2$ , and  
224 we fit an intercept-only GLMM to quantify the variance explained by only the random effects.

225

226 *Species-level analysis of hemoplasma prevalence*

227 We calculated infection prevalence per species, using the *metafor* package to estimate logit-  
228 transformed proportions and sampling variances (Viechtbauer, 2010). We used the *nlme* package  
229 to estimate phylogenetic signal as Pagel’s  $\lambda$  with a weighted phylogenetic generalized least  
230 squares (PGLS) model to account for within-species variance (Garamszegi, 2014). We next used  
231 a graph-partitioning algorithm, phylogenetic factorization, to flexibly identify clades with  
232 significantly different prevalence estimates at various taxonomic depths. We used the *taxize*

233 package to obtain a bat taxonomy from the National Center for Biotechnology Information  
234 (Chamberlain & Szöcs, 2013) and used the *phylofactor* package to partition prevalence as a  
235 Bernoulli-distributed response in a GLM (Washburne et al., 2019). We determined the number of  
236 significant bat clades using Holm's sequentially rejective test with a 5% family-wise error rate.

237 To identify species trait correlates of prevalence, we fit 11 PGLS models (weighted by  
238 sampling variance) with body mass, annual fecundity (litters per year \* pups per litter), dietary  
239 guild, quantitative diet, foraging strata, aspect ratio, roost type, roost flexibility, colony size,  
240 geographic range size, and evolutionary distinctiveness as predictors. We also fit PGLS models  
241 with sample size and with an intercept. We compared models with Akaike information criterion  
242 corrected for small sample sizes (AICc) and estimated  $R^2$  (Burnham & Anderson, 2002).

243

#### 244 *Hemoplasma phylogenetic analyses and genotype assignment*

245 We compared our 16S rRNA sequences to those in GenBank (Volokhov et al., 2017; Volokhov  
246 et al., 2011). Briefly, we aligned sequences using Clustal X, and inter- and intra-species  
247 similarity values were generated using BioEdit. Genetic distances were calculated with the  
248 Kimura two-parameter and Tamura–Nei models, and the bacterial phylogeny was constructed  
249 using MEGA 7 with the minimum evolution algorithm (Kumar, Stecher, & Tamura, 2016).

250 We assigned hemoplasma genotypes to positive bats based on analysis of the 16S rRNA  
251 partial gene (860–1000 bp) sequences in GenBank and their clustering on the phylogeny.  
252 Genotypes were designated as novel if (i) sequences differed from the closest hemoplasma  
253 sequences in GenBank by  $\geq 1.5\%$  and/or (ii) if sequence similarity was  $< 1.5\%$  but genotype-  
254 specific reproducible mutations (at least two per sequence) were observed between hemoplasma  
255 sequences from at least two independent bat samples and the nearest GenBank hemoplasma

256 sequences. These genotype-specific mutations were further used to differentiate closely related  
257 hemoplasma genotypes from our sample. We caution that genotype is not synonymous with  
258 species, as analysis of the 16S rRNA gene alone is insufficient for accurate species identification  
259 of *Mycoplasma* spp. (Volkhov et al., 2012). Future studies using genomics or housekeeping  
260 genes may identify independent but closely related hemoplasma species in our genotypes.

261 To assess if hemoplasma genotype assignments were associated with site and year, we  
262 used  $\chi^2$  tests with  $p$  values generated through a Monte Carlo procedure. Prior to our phylogenetic  
263 and network analyses of genotype distributions across bat species (see below), we used another  
264  $\chi^2$  test to assess the association between hemoplasma genotype identify and bat host identity.

265

#### 266 *Evolutionary relationships between bats and hemoplasmas*

267 To determine the degree to which bat hemoplasma genotypes display host specificity and to  
268 describe their evolutionary relationships with host species, we used our bat and hemoplasma  
269 phylogenies to construct a binary association matrix. To test the dependence of the hemoplasma  
270 phylogeny upon the bat phylogeny and thus assess evidence of evolutionary codivergence, we  
271 applied the Procrustes Approach to Cophylogeny (PACo) using distance matrices and the *paco*  
272 package (Hutchinson, Cagua, Balbuena, Stouffer, & Poisot, 2017). We used a jackknife  
273 procedure to estimate the degree to which each bat–genotype link supported a hypothesis of  
274 phylogenetic congruence; links were supported if their upper 95% confidence interval was below  
275 the mean of all squared jackknife residuals (Balbuena, Míguez-Lozano, & Blasco-Costa, 2013).

276

#### 277 *Hemoplasma genotype sharing among bat species*

278 We used hemoplasma genotype assignments to create a network, with each node representing a  
279 bat species and edges representing shared genotypes among bat species pairs. We built an  
280 adjacency matrix using the *igraph* package and used the Louvain method to assess the structure  
281 of bat–hemoplasma communities within this network (Csardi & Nepusz, 2006). To test whether  
282 the distribution of hemoplasma genotypes across our Neotropical bat species is shaped by host  
283 phylogeny, we used two GLMs to predict counts of shared genotypes (Poisson errors) and the  
284 presence of sharing (binomial errors) by phylogenetic distance between bat species. We assessed  
285 statistical significance using a quadratic assignment procedure via the *sna* package (Butts, 2008).

286 We calculated two metrics of network centrality to quantify different aspects of how  
287 important a node (bat species) is to hemoplasma genotype sharing: degree and eigenvector  
288 centrality (Bell, Atkinson, & Carlson, 1999). Whereas degree indicates the number of other  
289 species with which a host shares bacterial genotypes (i.e., links per node), eigenvector centrality  
290 indicates the tendency for a host to share genotypes with species that also share more genotypes  
291 (i.e., connectivity). Eigenvector centrality is thus an extension of degree that can identify hubs of  
292 parasite sharing (Gómez, Nunn, & Verdú, 2013). Both metrics were moderately correlated across  
293 ( $\rho=0.59$ ), with many non-zero degree species displaying zero eigenvector centrality. To examine  
294 spatial and temporal patterns in host centrality, we built separate adjacency networks per each  
295 site and year. We fit separate GLMs to ask how hemoplasma sharing centrality was predicted by  
296 site, year, and the two-way interaction. Degree was modeled as a Poisson-distributed response,  
297 while eigenvector centrality was logit-transformed and used Gaussian errors. We next applied  
298 phylogenetic factorization to each metric and weighted the algorithm by the square-root sample  
299 size per species (Garamszegi, 2014). We then fit the same PGLS models used in our prevalence  
300 analysis to identify the most competitive trait predictors of bat species centrality to hemoplasma

301 sharing. To assess whether network centrality is associated with hemoplasma prevalence, we  
302 lastly fit two weighted PGLS models with each centrality metric as a univariate predictor.

303

## 304 **Results**

### 305 *Hemoplasma infection status*

306 We detected sequence-confirmed hemoplasma infection in 239 of 469 individuals (51%; 95%  
307 CI: 46–55%), with positive individuals in 23 of the 33 sampled bat species (Table S3). Our  
308 phylogenetic GLMM explained 24% of the variation in infection status (Fig. 2A). Males had  
309 higher odds of infection than females (OR=2.26, 95% HDI: 1.07–4.92; Fig. 2B), and infection  
310 also varied by year, but only at one site (KK; Fig. 2C). Infection status was unrelated to  
311 ectoparasitism or reproduction. However, an intercept-only GLMM explained 18% of the  
312 variance, suggesting that species random effects were more important than the fixed effects

313

### 314 *Inter-species variation in hemoplasma prevalence*

315 Across bat species, hemoplasma prevalence ranged from 0% to 100% ( $\tilde{x}=0.37$ ). We estimated  
316 Pagel's  $\lambda$  in logit-transformed prevalence to be 0.39, indicating moderate phylogenetic signal.  
317 Similarly, phylogenetic factorization identified one bat clade with significantly lower prevalence  
318 compared to the paraphyletic remainder: the Emballonuridae (12% infected; Fig. 3A). Our trait-  
319 based analysis showed that relatively larger species ( $\beta=1.48$ ,  $p=0.01$ ,  $R^2=0.24$ ) and those with  
320 larger colonies ( $\beta=0.67$ ,  $p=0.06$ ,  $R^2=0.20$ ) had higher hemoplasma prevalence (Fig. 3B; Table 1).  
321 Relatively heavier ( $\geq 20$  g) and larger colony bat species included *Desmodus rotundus*, *Molossus*  
322 *rufus*, and *Pteronotus mesoamericanus*, for which infection prevalence was greater than 58%.

323

324 *Hemoplasma genotype diversity*

325 Our phylogenetic analysis identified 29 *Mycoplasma* genotypes in the Belize bat community  
326 (Table 2), including three identified prior from vampire bats (VBG1–3; Volokhov et al., 2017).  
327 All genotypes demonstrated minor levels of sequence variability (99.5–100%; Table 2). Based  
328 on comparisons with sequences from GenBank, 21 of these genotypes are novel hemoplasmas,  
329 five are closely related to non-hemoplasma mycoplasmas, and many are related to previously  
330 identified *Mycoplasma* spp. and hemoplasmas from other bat species (e.g., Millán et al., 2015),  
331 bat ticks (e.g., Hornok et al., 2019), primates (e.g., Madden, Moats, London, Matthew, & Sever,  
332 1974), and rodents (e.g., Goto, Yasuda, Hayashimoto, & Ebukuro, 2010; Fig. S3). A more  
333 detailed description of these 29 bacterial genotypes is provided within the Online Supplement.

334 After controlling for multiple comparisons, our 29 bacterial genotypes were associated  
335 with site ( $\chi^2=47.11$ ,  $p<0.01$ ) and year ( $\chi^2=40.40$ ,  $p<0.01$ ). Genotype composition was more  
336 diverse at LAR (Fig. S4), and KK hemoplasmas were dominated by vampire bat genotypes  
337 (VBG1–3). Genotype composition was more idiosyncratic by study year. However, these 29  
338 bacterial genotypes were most strongly associated with bat species ( $\chi^2=3532$ ,  $p<0.01$ ; Fig. S4).

339

340 *Bat–hemoplasma evolutionary relationships*

341 Although some hemoplasma genotypes were shared between bat species (i.e., VBG1, CS2, PPM,  
342 EF1, AH1–2, MYE, PLU, SP;  $n=9$ ), most showed strong host specificity ( $n=20$ ; Table 2). Our  
343 coevolutionary analysis (PACo) supported strong congruence between bat and hemoplasma  
344 phylogenies ( $m^2_{XY}=33.76$ ,  $p<0.01$ ; Fig. 4), suggesting that hemoplasma evolution has mostly  
345 tracked bat speciation. However, PACo also demonstrated that only 49% of the 41 unique bat–  
346 hemoplasma links displayed significant evidence of coevolution (Fig. S5), and these patterns



347 were almost exclusively found within the Phyllostomidae (with the exception of *Saccopteryx*  
348 *bilineata* and its *Mycoplasma muris*-like bacterial genotype). The other 21 bat-hemoplasma  
349 links therefore displayed evidence of phylogenetic incongruence and thus likely host shifts.

350

### 351 *Hemoplasma* genotype sharing networks

352 Within our bat-hemoplasma network, genotype sharing was restricted to five host communities,  
353 whereas six genotypes were each restricted to a single bat species (Fig. 5A). GLMs showed that  
354 both the frequency and presence of genotype sharing declined with phylogenetic distance  
355 between bat species (Poisson:  $p < 0.001$ ,  $R^2 = 0.08$ ; binomial:  $p < 0.001$ ,  $R^2 = 0.51$ ; Fig. 5B).

356 Bat species shared hemoplasma genotypes with zero to five other species (i.e., degree),  
357 and most hosts were not central to the network of genotype sharing (i.e., eigenvector centrality of  
358 zero). Six bat species had non-zero eigenvector centrality values that ranged from 37% to 100%,  
359 indicating that these hosts generally shared more hemoplasma genotypes with other highly  
360 connected hosts. Stratifying our hemoplasma genotype network across sites and years showed  
361 that centrality measures varied by space but not time (Fig. S7, Table S4). We observed no  
362 hemoplasma genotype sharing at KK, likely reflecting lower host diversity (Herrera et al., 2018).

363 Phylogenetic factorization identified similar bat clades with significantly different  
364 centrality compared to the paraphyletic remainder (Fig. 6A–B). For degree, the algorithm only  
365 identified *Artibeus lituratus* as being more central ( $x_{\square} = 5$ ) than other bats ( $x_{\square} = 1.14$ ). However,  
366 phylogenetic factorization identified three taxa in the subfamily Stenodermatinae that had  
367 significantly elevated eigenvector centrality: the genera *Artibeus* and *Dermanura* ( $x_{\square} = 0.67$   
368 compared to  $x_{\square} = 0.02$  in all other bats), the species *Artibeus lituratus* ( $x_{\square} = 1$  compared to  
369  $x_{\square} = 0.12$ ), and the species *Sturnira parvidens* ( $x_{\square} = 0.37$  compared to  $x_{\square} = 0.15$ ). Mirroring these

370 results, phylogenetic signal was absent for degree ( $\lambda=0$ ) but high for eigenvector centrality  
371 ( $\lambda=0.93$ ).

372 Trait-based analyses showed that degree centrality was best predicted by diet (Table S5);  
373 bat species feeding more heavily on fruit and nectar shared more bacterial genotypes with other  
374 species ( $\beta=0.004$ ,  $p<0.001$ ,  $R^2=0.20$ ; Fig. 6C). Similarly, eigenvector centrality was best  
375 predicted by bat colony size and diet (Table S6); highly central species had small colonies  
376 ( $\beta_{large}=-1.93$ ,  $p=0.05$ ,  $R^2=0.13$ ) and fed more on plants ( $\beta=0.03$ ,  $p<0.01$ ,  $R^2=0.10$ ; Fig. 6D).

377 As a final analysis, we assessed whether network centrality (i.e., a bat species' role in  
378 hemoplasma genotype sharing) predicted contemporary infection prevalence (Fig. S8). However,  
379 we found no associations between species-level infection prevalence and centrality as measured  
380 by degree ( $\beta=-0.13$ ,  $R^2=0.03$ ,  $p=0.42$ ) or eigenvector centrality ( $\beta=-0.20$ ,  $R^2<0.01$ ,  $p=0.79$ ).

381

## 382 **Discussion**

383 By examining the prevalence and distribution of a common bacterial pathogen (hemoplasmas) in  
384 a diverse bat community, we expanded analysis of the ecological and evolutionary predictors of  
385 bat infection and pathogen sharing beyond viruses. Across the bat community, hemoplasma  
386 infection risk was generally higher for males but was better predicted by phylogeny, with large-  
387 bodied and large-colony bat species showing greater prevalence. Hemoplasmas showed high  
388 diversity and mostly strict host associations, with strong congruence between the bat and  
389 hemoplasma phylogenies. Although codivergence was supported by our analyses, we also  
390 observed hemoplasma genotype sharing and evidence of historical host shifts between closely  
391 related bats. Species most central to this hemoplasma sharing network displayed taxonomic  
392 clustering and were disproportionately frugivores and nectarivores. Yet these highly central bat

393 species did not also have the highest hemoplasma prevalence, reinforcing mostly infrequent  
394 bacterial sharing between species. Our work reveals phylogenetic patterns in hemoplasma  
395 infection in a diverse bat community while contributing to broader efforts to understand the host  
396 specificity of bacterial pathogens and their cross-species transmission risks in wildlife.

397       Whereas many bacterial pathogens, including hemoplasmas, are common in bats (Bai et  
398 al., 2011; Becker et al., 2018; Ikeda et al., 2017; Mascarelli et al., 2014; Millán et al., 2015;  
399 Volokhov et al., 2017), the factors that confer high infection probability are poorly understood.  
400 In the Belize bat community, the odds of hemoplasma infection were higher in males, mirroring  
401 male-biased transmission previously detected in feline and canine systems (Soto et al., 2017;  
402 Walker Vergara et al., 2016). Such patterns could stem from males mounting weaker immune  
403 responses than females (Kelly, Stoehr, Nunn, Smyth, & Prokop, 2018) or to male defense of  
404 multi-female roosts in many Neotropical bat species (Voigt, von Helversen, Michener, & Kunz,  
405 2001). Direct transmission of hemoplasmas has been demonstrated in feline and rodent systems  
406 (Cohen et al., 2018; Museux et al., 2009) but only inferred in bats from metagenomic studies  
407 detecting these bacteria in saliva (Volokhov et al., 2017). We found weak support for the  
408 hypothesis that ectoparasites play a role in infection risks (Hornok et al., 2019; Willi, Boretti,  
409 Meli, et al., 2007). Male bias in infection further casts doubt on vector-borne transmission, as  
410 female bats generally have elevated ectoparasitism (Frank, Mendenhall, Judson, Daily, & Hadly,  
411 2016). Although prior work has suggested some bacterial infections to be endemic in bats  
412 (Becker et al., 2018; Millán et al., 2015; Volokhov et al., 2017), we also found yearly infection  
413 patterns varied by habitat. Prevalence varied little between years in the LAR but was dynamic in  
414 the fragmented site (KK). Fragmentation could promote unstable infection patterns by altering  
415 susceptibility (e.g., the microbiota; Ingala, Becker, Holm, Kristiansen, & Simmons, 2019) or

416 community composition (e.g., relative abundance of competent hosts; Keesing, Holt, & Ostfeld,  
417 2006). Longitudinal studies could confirm these patterns and elucidate transmission routes.

418         Across Neotropical bats, we found phylogeny to be a better predictor of hemoplasma  
419 infection risk than individual traits, site, or year. Phylogenetic factorization identified one clade,  
420 the Emballonuridae (*Saccopteryx bilineata* and *Rhynchonycteris naso*), with significantly lower  
421 prevalence than all other bats in the community. This moderate phylogenetic signal mirrors  
422 comparable effects of phylogeny for bat viruses (Guy, Thiagavel, Mideo, & Ratcliffe, 2019;  
423 Schmidt John Paul et al., 2019), similarly suggesting potential for innate differences in species  
424 susceptibility or pathogen exposure. Trait-based analyses revealed that this taxonomic pattern  
425 was driven by heavier species and those with larger colony sizes having greater hemoplasma  
426 prevalence. Small-bodied species could have low prevalence due to small blood volumes and  
427 low bacterial titers (Volokhov et al., 2017). Alternatively, the positive, saturating relationship  
428 between body mass and bacterial prevalence could be driven by allometric patterns in  
429 competence (Downs et al., 2019), in contrast to weak or opposite relationships between mass and  
430 viral richness across bats (Guy et al., 2019; Han, Schmidt, et al., 2016; Olival et al., 2017). As  
431 larger-bodied bat species can also be more abundant in Neotropical habitat fragments (Herrera et  
432 al., 2018), these results suggest land conversion could increase the frequency of bat species most  
433 capable of maintaining hemoplasma infection. Similarly, positive relationships between colony  
434 size and prevalence could support density-dependent transmission of bacteria (McCallum et al.,  
435 2001), whereas mixed support has been found for bat viruses (Streicker et al., 2012; Webber,  
436 Fletcher, & Willis, 2017). Future work could test how community-wide infection patterns vary  
437 across broader habitat gradients and use multiple bacteria to assess the generality of these trends.

438           Approximately two-thirds of Neotropical bat species were infected by hemoplasmas, for  
439           which we observed high genetic diversity consistent with other studies of this bacterial pathogen  
440           in bats (Mascarelli et al., 2014; Millán et al., 2015; Volokhov et al., 2017). However, genotypes  
441           detected here were mostly novel and only weakly related to hemoplasmas described elsewhere in  
442           Latin America (Ikeda et al., 2017; Millán et al., 2019), with the exception of those previously  
443           identified from vampire bats in Peru and Belize (Volokhov et al., 2017). When considering the  
444           phylogenetic scale of genotypes, most hemoplasmas were host specific. Over half our  
445           hemoplasma communities consisted of a single bat–genotype association, matching the degree of  
446           host specificity observed more generally for *Mycoplasma* spp. (Citti & Blanchard, 2013; Pitcher  
447           & Nicholas, 2005). When we did detect genotype sharing between species, this occurred mostly  
448           between closely related hosts (e.g., PPM was detected in *Pteronotus mesoamericanus* and *P.*  
449           *fulvus*), indicating that bat phylogenetic distance decreased the probability of bacterial transfer.

450           Analyses to characterize species centrality to the hemoplasma genotype sharing network  
451           showed that one species (*Artibeus lituratus*) and the subfamily Stenodermatinae played key  
452           roles. This clade, and especially the genera *Artibeus* and *Dermanura* (formerly all classified in  
453           *Artibeus*), was the only taxon with non-zero connectivity, and this pattern was reflected in fruit-  
454           and nectar-based diets and small colonies being the primary predictors of centrality. The strictly  
455           frugivorous Stenodermatinae represents a recent divergence in the Phyllostomidae (Botero-  
456           Castro et al., 2013), and high centrality of these species may indicate weaker phylogenetic  
457           barriers for bacterial transmission between hosts in this clade. Two other analyses reinforced  
458           infrequent and conserved hemoplasma sharing between species. First, phylogenetic patterns in  
459           prevalence were distinct from those in genotype sharing centrality (e.g., large-colony species had  
460           higher prevalence but lower connectivity), and prevalence accordingly did not predict centrality.

461 Second, we found general congruence between bat and hemoplasma phylogenies. Although this  
462 shows codivergence is a strong evolutionary force, congruence can also stem from preferential  
463 jumps to closely related hosts (De Vienne et al., 2013). Though we cannot rule out that some  
464 host shifts may be artefacts of the limited resolution of both the phylogenies, our evolutionary  
465 analyses and genotype sharing results imply that hemoplasma host shifts are possible yet rare.

466 By sampling a diverse assemblage of bacterial genotypes in an ecologically and  
467 evolutionary rich host community, our work has broader implications for our understanding of  
468 disease emergence. Many bacterial pathogens are thought to be generalists and relatively  
469 unlikely to specialize in a novel host (Pedersen, Altizer, Poss, Cunningham, & Nunn, 2005;  
470 Woolhouse & Gowtage-Sequeria, 2005), in contrast to many viruses in which host shifts are  
471 more common owing to high mutation rates and short infectious periods (Geoghegan et al., 2017;  
472 Longdon, Brockhurst, Russell, Welch, & Jiggins, 2014). Recent theoretical work suggests host  
473 shift speciation may be less common for bacteria because of higher phenotypic plasticity (e.g.,  
474 the ability to reside in diverse habitats) and a slower tempo of evolution (Bonneaud et al., 2019).  
475 Obligate reliance of *Mycoplasma* spp. on host cells and more chronic infections likely explains  
476 their propensity to specialize (Citti & Blanchard, 2013; Cohen et al., 2018). More broadly,  
477 however, using genetics to infer pathogen sharing, rather than coarser phylogenetic scales (e.g.,  
478 species complexes or genera), is increasingly showing that many bacterial strains may be more  
479 host specific (Withenshaw, Devevey, Pedersen, & Fenton, 2016). The high specialism of bat  
480 hemoplasma genotypes thus underscores the importance of using finer phylogenetic scales in the  
481 study of infectious disease (Fountain-Jones et al., 2018; Graham, Storch, & Machac, 2018).

482 Comparative analyses of viruses have suggested that phylogenetically conserved  
483 pathogen jumps between species may be a broader generality in the study of disease emergence

484 (Albery, Eskew, Ross, & Olival, 2019; Luis et al., 2015; Streicker et al., 2010). With few  
485 exceptions, our results on hemoplasma genotype sharing between Neotropical bat species are  
486 generally consistent with this pattern for a bacterial pathogen. Two cases in which hemoplasmas  
487 were shared between more distantly related species included the VBG1 genotype in *Desmodus*  
488 *rotundus* and *Pteronotus fulvus* (Phyllostomidae and Mormoopidae) and the EF1 genotype in  
489 *Glossophaga soricina* and *Saccopteryx bilineata* (Phyllostomidae and Emballonuridae). For the  
490 latter, both bat species co-roost in the LAR, which suggests an ecological context for pathogen  
491 exposure over current timescales. However, other genetic markers (e.g., *rpoB*, *rpoC*, *gyrB*)  
492 would be necessary to infer contemporary cross-species transmission (Kämpfer & Glaeser, 2012;  
493 Volokhov et al., 2012), as analysis of the 16s rRNA gene alone is insufficient for hemoplasma  
494 species identification (Volokhov et al., 2012). If hemoplasmas are more likely to specialize  
495 rather than expand their range into new and unrelated species, genotype sharing between  
496 unrelated bats could represent more transient spillovers (Bonneaud et al., 2019). As specialized  
497 pathogens could be more transmissible than generalists (Futuyma & Moreno, 1988; Garamszegi,  
498 2006), species with high prevalence of specialist genotypes could be prioritized for surveillance.

499         In conclusion, our analysis of a diverse community of bats and their pathogen genotypes  
500 identifies several key ecological and evolutionary factors structuring bacterial infection within  
501 and between species and provides a starting point for contrasts with such patterns for viruses.  
502 Similar to bat viral infections, we found moderate phylogenetic signal in bacterial prevalence.  
503 However, these phylogenetic patterns in hemoplasma prevalence were decoupled from those  
504 describing bat species centrality in sharing hemoplasma genotypes, such that genotype sharing  
505 was generally restricted by bat phylogeny. These findings imply the codivergence of bats and  
506 their bacterial pathogens alongside rare and phylogenetically constrained host shifts. More

507 broadly, our study highlights the importance of using fine phylogenetic scales when assessing  
508 host specificity and suggests phylogenetic similarity may play a key role in host shifts for not  
509 only viruses but also bacteria. Our work also more broadly contributes to increasing efforts to  
510 understand cross-species transmission and epidemiological consequences of bacterial pathogens.

511

### 512 **Competing interests**

513 We have no competing interests.

514

### 515 **Data accessibility**

516 Individual-level data are available in Dryad

517 ([https://datadryad.org/stash/share/7qOGkejyIldAcD9FEZHNNVCc\\_4k0lmmiABy0EiRwZoo](https://datadryad.org/stash/share/7qOGkejyIldAcD9FEZHNNVCc_4k0lmmiABy0EiRwZoo)).

518 Bat species trait data are available in Table S2. Hemoplasma sequences are available in GenBank  
519 (MH245119–MH245194 and MK353807–MK353892).

520

### 521 **Funding**

522 DJB was funded by the ARCS Foundation, American Society of Mammalogists, Odum School  
523 of Ecology, Explorer's Club, and NSF DEB-1601052. RKP was supported by NSF DEB-

524 1716698, the Defense Advanced Research Projects Agency (DARPA D16AP00113 and the

525 DARPA PREEMPT program Cooperative Agreement D18AC00031), U.S. National Institutes of

526 General Medical Sciences IDeA Program (P20GM103474 and P30GM110732), and the USDA

527 National Institute of Food and Agriculture (Hatch project 1015891). DJB and KAS were both

528 supported by the American Museum of Natural History Theodore Roosevelt Memorial Fund.

529 NBS was supported by the American Museum of Natural History Taxonomic Mammalogy Fund.



530 DGS was supported by a Sir Henry Dale Fellowship, jointly funded by the Wellcome Trust and  
531 Royal Society (102507/Z/13/Z). The views, opinions, and/or findings expressed are those of the  
532 authors and should not be interpreted as representing the official views or policies of the  
533 Department of Defense or the U.S. Government.

534

### 535 **Acknowledgements**

536 For assistance with field logistics, bat sampling, and permits, we thank Mark Howells, Neil  
537 Duncan, James Herrera, Melissa Ingala, and staff of the Lamanai Field Research Center. We also  
538 thank the many colleagues who helped net bats during 2017–2018 bat research in Belize. We  
539 thank Seth Walk, Susan Broadway, and Jonathan Martinson for laboratory access and assistance.

540

### 541 **Statement of authorship**

542 DJB, KAS, and AMB collected samples; NBS and MBF coordinated fieldwork; RKP, SA, and  
543 DGS supported laboratory analyses; DVV and VEC conducted molecular and phylogenetic  
544 analyses; and ADW and DGS assisted with statistical analyses. DJB analyzed data, produced  
545 figures, and wrote the manuscript. All authors provided critical review of the manuscript.

546

547 **References**

- 548 Albery, G. F., Eskew, E. A., Ross, N., & Olival, K. J. (2019). Predicting the global mammalian  
549 viral sharing network using phylogeography. *BioRxiv*, 732255.
- 550 Bai, Y., Kosoy, M., Recuenco, S., Alvarez, D., Moran, D., Turmelle, A., ... Rupprecht, C.  
551 (2011). Bartonella spp. in Bats, Guatemala. *Emerging Infectious Diseases*, 17(7), 1269–  
552 1272. doi: 10.3201/eid1707.101867
- 553 Baillie, J., Hilton-Taylor, C., & Stuart, S. N. (2004). *IUCN red list of threatened species: a*  
554 *global species assessment*. IUCN.
- 555 Balbuena, J. A., Míguez-Lozano, R., & Blasco-Costa, I. (2013). PACo: A Novel Procrustes  
556 Application to Cophylogenetic Analysis. *PLOS ONE*, 8(4), e61048. doi:  
557 10.1371/journal.pone.0061048
- 558 Barrow, L. N., McNew, S. M., Mitchell, N., Galen, S. C., Lutz, H. L., Skeen, H., ... Witt, C. C.  
559 (2019). Deeply conserved susceptibility in a multi-host, multi-parasite system. *Ecology*  
560 *Letters*, 22(6), 987–998. doi: 10.1111/ele.13263
- 561 Becker, D. J., Bergner, L. M., Bentz, A. B., Orton, R. J., Altizer, S., & Streicker, D. G. (2018).  
562 Genetic diversity, infection prevalence, and possible transmission routes of Bartonella  
563 spp. in vampire bats. *PLOS Neglected Tropical Diseases*, 12(9), e0006786. doi:  
564 10.1371/journal.pntd.0006786
- 565 Becker, D. J., Crowley, D. E., Washburne, A. D., & Plowright, R. K. (2019). Temporal and  
566 spatial limitations in global surveillance for bat filoviruses and henipaviruses. *Biology*  
567 *Letters*, 15(12), 20190423. doi: 10.1098/rsbl.2019.0423

- 568 Bell, D. C., Atkinson, J. S., & Carlson, J. W. (1999). Centrality measures for disease  
569 transmission networks. *Social Networks*, 21(1), 1–21. doi: 10.1016/S0378-  
570 8733(98)00010-0
- 571 Blyton, M. D. J., Banks, S. C., Peakall, R., Lindenmayer, D. B., & Gordon, D. M. (2014). Not all  
572 types of host contacts are equal when it comes to E. coli transmission. *Ecology Letters*,  
573 17(8), 970–978. doi: 10.1111/ele.12300
- 574 Bonneaud, C., Weinert, L., & Kuijper, B. (2019). Understanding the emergence of bacterial  
575 pathogens in novel hosts. *Phil. Trans. R. Soc. B*. doi: 10.1098/rstb.2018.0328
- 576 Botero-Castro, F., Tilak, M., Justy, F., Catzeflis, F., Delsuc, F., & Douzery, E. J. P. (2013). Next-  
577 generation sequencing and phylogenetic signal of complete mitochondrial genomes for  
578 resolving the evolutionary history of leaf-nosed bats (Phyllostomidae). *Molecular*  
579 *Phylogenetics and Evolution*, 69(3), 728–739. doi: 10.1016/j.ympev.2013.07.003
- 580 Bürkner, P.-C. (2017). brms: An R package for Bayesian multilevel models using Stan. *Journal*  
581 *of Statistical Software*, 80(1), 1–28.
- 582 Burnham, K. P., & Anderson, D. R. (2002). *Model selection and multimodel inference: a*  
583 *practical information-theoretic approach*. Springer Science & Business Media.
- 584 Butts, C. T. (2008). Social network analysis with sna. *Journal of Statistical Software*, 24(6), 1–  
585 51.
- 586 Chamberlain, S. A., & Szöcs, E. (2013). taxize: taxonomic search and retrieval in R.  
587 *F1000Research*, 2.
- 588 Citti, C., & Blanchard, A. (2013). Mycoplasmas and their host: emerging and re-emerging  
589 minimal pathogens. *Trends in Microbiology*, 21(4), 196–203. doi:  
590 10.1016/j.tim.2013.01.003

- 591 Clare, E. L., Lim, B. K., Engstrom, M. D., Eger, J. L., & Hebert, P. D. (2007). DNA barcoding  
592 of Neotropical bats: species identification and discovery within Guyana. *Molecular*  
593 *Ecology Notes*, 7(2), 184–190.
- 594 Cohen, C., Shemesh, M., Garrido, M., Messika, I., Einav, M., Khokhlova, I., ... Hawlena, H.  
595 (2018). Haemoplasmas in wild rodents: Routes of transmission and infection dynamics.  
596 *Molecular Ecology*, 27(18), 3714–3726. doi: 10.1111/mec.14826
- 597 Csardi, G., & Nepusz, T. (2006). The igraph software package for complex network research.  
598 *InterJournal, Complex Systems*, 1695(5), 1–9.
- 599 Dallas, T. A., Han, B. A., Nunn, C. L., Park, A. W., Stephens, P. R., & Drake, J. M. (2019). Host  
600 traits associated with species roles in parasite sharing networks. *Oikos*, 128(1), 23–32.
- 601 De Vienne, D. M., Refrégier, G., López-Villavicencio, M., Tellier, A., Hood, M. E., & Giraud,  
602 T. (2013). Cospeciation vs host-shift speciation: methods for testing, evidence from  
603 natural associations and relation to coevolution. *New Phytologist*, 198(2), 347–385.
- 604 Downs, C. J., Schoenle, L. A., Han, B. A., Harrison, J. F., & Martin, L. B. (2019). Scaling of  
605 Host Competence. *Trends in Parasitology*, 0(0). doi: 10.1016/j.pt.2018.12.002
- 606 Drexler, J. F., Corman, V. M., Müller, M. A., Maganga, G. D., Vallo, P., Binger, T., ... others.  
607 (2012). Bats host major mammalian paramyxoviruses. *Nature Communications*, 3, 796.
- 608 Edgar, R. C., Haas, B. J., Clemente, J. C., Quince, C., & Knight, R. (2011). UCHIME improves  
609 sensitivity and speed of chimera detection. *Bioinformatics*, 27(16), 2194–2200. doi:  
610 10.1093/bioinformatics/btr381
- 611 Evans, N. J., Bown, K., Timofte, D., Simpson, V. R., & Birtles, R. J. (2009). Fatal Borreliosis in  
612 Bat Caused by Relapsing Fever Spirochete, United Kingdom. *Emerging Infectious*  
613 *Diseases*, 15(8), 1331–1333. doi: 10.3201/eid1508.090475

- 614 Fenton, A., Streicker, D. G., Petchey, O. L., & Pedersen, A. B. (2015). Are All Hosts Created  
615 Equal? Partitioning Host Species Contributions to Parasite Persistence in Multihost  
616 Communities. *The American Naturalist*, 186(5), 610–622. doi: 10.1086/683173
- 617 Fenton, M. B., Bernard, E., Bouchard, S., Hollis, L., Johnston, D. S., Lausen, C. L., ... Zigouris,  
618 J. (2001). The bat fauna of Lamanai, Belize: roosts and trophic roles. *Journal of Tropical*  
619 *Ecology*, 17(4), 511–524.
- 620 Fountain-Jones, N. M., Pearse, W. D., Escobar, L. E., Alba-Casals, A., Carver, S., Davies, T. J.,  
621 ... Worsley-Tonks, K. (2018). Towards an eco-phylogenetic framework for infectious  
622 disease ecology. *Biological Reviews*, 93(2), 950–970.
- 623 Frank, H. K., Mendenhall, C. D., Judson, S. D., Daily, G. C., & Hadly, E. A. (2016).  
624 Anthropogenic impacts on Costa Rican bat parasitism are sex specific. *Ecology and*  
625 *Evolution*, 6(14), 4898–4909. doi: 10.1002/ece3.2245
- 626 Futuyma, D. J., & Moreno, G. (1988). The evolution of ecological specialization. *Annual Review*  
627 *of Ecology and Systematics*, 19(1), 207–233.
- 628 Garamszegi, L. Z. (2006). The evolution of virulence and host specialization in malaria parasites  
629 of primates. *Ecology Letters*, 9(8), 933–940. doi: 10.1111/j.1461-0248.2006.00936.x
- 630 Garamszegi, L. Z. (2014). *Modern Phylogenetic Comparative Methods and Their Application in*  
631 *Evolutionary Biology: Concepts and Practice*. Springer.
- 632 Geoghegan, J. L., Duchêne, S., & Holmes, E. C. (2017). Comparative analysis estimates the  
633 relative frequencies of co-divergence and cross-species transmission within viral families.  
634 *PLOS Pathogens*, 13(2), e1006215. doi: 10.1371/journal.ppat.1006215
- 635 Gómez, J. M., Nunn, C. L., & Verdú, M. (2013). Centrality in primate–parasite networks reveals  
636 the potential for the transmission of emerging infectious diseases to humans. *Proceedings*

- 637           of the National Academy of Sciences, 110(19), 7738–7741. doi:  
638           10.1073/pnas.1220716110
- 639 González-Salazar, C., Martínez-Meyer, E., & López-Santiago, G. (2014). A hierarchical  
640           classification of trophic guilds for North American birds and mammals. *Revista*  
641           *Mexicana de Biodiversidad*, 85(3), 931–941. doi: 10.7550/rmb.38023
- 642 Goto, K., Yasuda, M., Hayashimoto, N., & Ebukuro, S. (2010). Morphological and sequence  
643           analysis of Mycoplasma sp. isolated from the oral cavity of a house musk shrew (*Suncus*  
644           *murinus*). *The Journal of Veterinary Medical Science*, 72(1), 109–111.
- 645 Graham, C. H., Storch, D., & Machac, A. (2018). Phylogenetic scale in ecology and evolution.  
646           *Global Ecology and Biogeography*, 27(2), 175–187. doi: 10.1111/geb.12686
- 647 Gunnell, G. F., & Simmons, N. B. (2012). *Evolutionary history of bats: fossils, molecules and*  
648           *morphology*. Cambridge University Press.
- 649 Guy, C., Thiagavel, J., Mideo, N., & Ratcliffe, J. M. (2019). Phylogeny matters: revisiting ‘a  
650           comparison of bats and rodents as reservoirs of zoonotic viruses.’ *Royal Society Open*  
651           *Science*, 6(2), 181182.
- 652 Han, B. A., Kramer, A. M., & Drake, J. M. (2016). Global Patterns of Zoonotic Disease in  
653           Mammals. *Trends in Parasitology*, 32(7), 565–577.
- 654 Han, B. A., Schmidt, J. P., Alexander, L. W., Bowden, S. E., Hayman, D. T., & Drake, J. M.  
655           (2016). Undiscovered bat hosts of filoviruses. *PLOS Negl Trop Dis*, 10(7), e0004815.
- 656 Herrera, J. P., Duncan, N., Clare, E., Fenton, M. B., & Simmons, N. (2018). Disassembly of  
657           Fragmented Bat Communities in Orange Walk District, Belize. *Acta Chiropterologica*,  
658           20(1), 147–159. doi: 10.3161/15081109ACC2018.20.1.011

- 659 Hijmans, R. J., Williams, E., Vennes, C., & Hijmans, M. R. J. (2019). Package ‘geosphere.’  
660 *Spherical Trigonometry*, 1–5.
- 661 Hochachka, W. M., & Dhondt, A. A. (2000). Density-dependent decline of host abundance  
662 resulting from a new infectious disease. *Proceedings of the National Academy of*  
663 *Sciences*, 97(10), 5303–5306.
- 664 Hornok, S., Szőke, K., Meli, M. L., Sándor, A. D., Görföl, T., Estók, P., ... Hofmann-Lehmann,  
665 R. (2019). Molecular detection of vector-borne bacteria in bat ticks (Acari: Ixodidae,  
666 Argasidae) from eight countries of the Old and New Worlds. *Parasites & Vectors*, 12(1),  
667 50. doi: 10.1186/s13071-019-3303-4
- 668 Huang, S., Bininda-Emonds, O. R., Stephens, P. R., Gittleman, J. L., & Altizer, S. (2014).  
669 Phylogenetically related and ecologically similar carnivores harbour similar parasite  
670 assemblages. *Journal of Animal Ecology*, 83(3), 671–680.
- 671 Huang, S., Drake, J. M., Gittleman, J. L., & Altizer, S. (2015). Parasite diversity declines with  
672 host evolutionary distinctiveness: A global analysis of carnivores. *Evolution*, 69(3), 621–  
673 630. doi: 10.1111/evo.12611
- 674 Hutchinson, M. C., Cagua, E. F., Balbuena, J. A., Stouffer, D. B., & Poisot, T. (2017). paco:  
675 implementing Procrustean Approach to Cophylogeny in R. *Methods in Ecology and*  
676 *Evolution*, 8(8), 932–940.
- 677 Ikeda, P., Seki, M. C., Carrasco, A. O. T., Rudiak, L. V., Miranda, J. M. D., Gonçalves, S. M.  
678 M., ... others. (2017). Evidence and molecular characterization of Bartonella spp. and  
679 hemoplasmas in neotropical bats in Brazil. *Epidemiology & Infection*, 1–15.

- 680 Ingala, M. R., Becker, D. J., Holm, J. B., Kristiansen, K., & Simmons, N. B. (2019). Habitat  
681 fragmentation is associated with dietary shifts and microbiota variability in common  
682 vampire bats. *Ecology and Evolution*, 0(0). doi: 10.1002/ece3.5228
- 683 Johnson, P. T. J., Rohr, J. R., Hoverman, J. T., Kellermanns, E., Bowerman, J., & Lunde, K. B.  
684 (2012). Living fast and dying of infection: host life history drives interspecific variation  
685 in infection and disease risk. *Ecology Letters*, 15(3), 235–242. doi: 10.1111/j.1461-  
686 0248.2011.01730.x
- 687 Kämpfer, P., & Glaeser, S. P. (2012). Prokaryotic taxonomy in the sequencing era—the  
688 polyphasic approach revisited. *Environmental Microbiology*, 14(2), 291–317.
- 689 Keesing, F., Holt, R. D., & Ostfeld, R. S. (2006). Effects of species diversity on disease risk.  
690 *Ecology Letters*, 9(4), 485–498. doi: 10.1111/j.1461-0248.2006.00885.x
- 691 Kellner, A., Carver, S., Scorza, V., McKee, C. D., Lappin, M., Crooks, K. R., ... Antolin, M. F.  
692 (2018). Transmission pathways and spillover of an erythrocytic bacterial pathogen from  
693 domestic cats to wild felids. *Ecology and Evolution*, 8(19), 9779–9792. doi:  
694 10.1002/ece3.4451
- 695 Kelly, C. D., Stoehr, A. M., Nunn, C., Smyth, K. N., & Prokop, Z. M. (2018). Sexual  
696 dimorphism in immunity across animals: a meta-analysis. *Ecology Letters*, 21(12), 1885–  
697 1894. doi: 10.1111/ele.13164
- 698 Kembel, S. W., Cowan, P. D., Helmus, M. R., Cornwell, W. K., Morlon, H., Ackerly, D. D., ...  
699 Webb, C. O. (2010). Picante: R tools for integrating phylogenies and ecology.  
700 *Bioinformatics*, 26(11), 1463–1464.
- 701 Kumar, S., Stecher, G., & Tamura, K. (2016). MEGA7: molecular evolutionary genetics analysis  
702 version 7.0 for bigger datasets. *Molecular Biology and Evolution*, 33(7), 1870–1874.



- 703 Lei, B. R., & Olival, K. J. (2014). Contrasting Patterns in Mammal–Bacteria Coevolution:  
704 Bartonella and Leptospira in Bats and Rodents. *PLOS Neglected Tropical Diseases*, 8(3),  
705 e2738. doi: 10.1371/journal.pntd.0002738
- 706 Longdon, B., Brockhurst, M. A., Russell, C. A., Welch, J. J., & Jiggins, F. M. (2014). The  
707 Evolution and Genetics of Virus Host Shifts. *PLOS Pathogens*, 10(11), e1004395. doi:  
708 10.1371/journal.ppat.1004395
- 709 Luis, A. D., O’Shea, T. J., Hayman, D. T. S., Wood, J. L. N., Cunningham, A. A., Gilbert, A. T.,  
710 ... Webb, C. T. (2015). Network analysis of host–virus communities in bats and rodents  
711 reveals determinants of cross-species transmission. *Ecology Letters*, 18(11), 1153–1162.  
712 doi: 10.1111/ele.12491
- 713 Madden, D. L., Moats, K. E., London, W. T., Matthew, E. B., & Sever, J. L. (1974).  
714 Mycoplasma moatsii, a new species isolated from recently imported Grivet monkeys  
715 (Cercopithecus aethiops). *International Journal of Systematic and Evolutionary*  
716 *Microbiology*, 24(4), 459–464.
- 717 Maggi, R. G., Compton, S. M., Trull, C. L., Mascarelli, P. E., Mozayeni, B. R., & Breitschwerdt,  
718 E. B. (2013). Infection with hemotropic Mycoplasma species in patients with or without  
719 extensive arthropod or animal contact. *Journal of Clinical Microbiology*, 51(10), 3237–  
720 3241.
- 721 Mascarelli, P. E., Keel, M. K., Yabsley, M., Last, L. A., Breitschwerdt, E. B., & Maggi, R. G.  
722 (2014). Hemotropic mycoplasmas in little brown bats (Myotis lucifugus). *Parasit*  
723 *Vectors*, 7, 117.
- 724 McCallum, H., Barlow, N., & Hone, J. (2001). How should pathogen transmission be modelled?  
725 *Trends in Ecology & Evolution*, 16(6), 295–300. doi: 10.1016/S0169-5347(01)02144-9

- 726 McKee, C. D., Krawczyk, A. I., Sándor, A., Görföl, T., Földvári, M., & Földvári, G. (2019).  
727 Host phylogeny, geographic overlap, and roost sharing shape parasite communities in  
728 European bats. *Frontiers in Ecology and Evolution*, 7.
- 729 Messick, J. B. (2004). Hemotrophic mycoplasmas (hemoplasmas): a review and new insights  
730 into pathogenic potential. *Veterinary Clinical Pathology*, 33(1), 2–13. doi:  
731 10.1111/j.1939-165X.2004.tb00342.x
- 732 Michonneau, F., Brown, J. W., & Winter, D. J. (2016). rotl: an R package to interact with the  
733 Open Tree of Life data. *Methods in Ecology and Evolution*. doi: 10.1111/2041-  
734 210X.12593
- 735 Millán, J., Cevidanes, A., Sacristán, I., Alvarado, M., Sepúlveda, G., Ramos-Mella, C. A., &  
736 Lisón, F. (2019). Detection and Characterization of Hemotropic Mycoplasmas in Bats in  
737 Chile. *Journal of Wildlife Diseases*. doi: 10.7589/2018-12-290
- 738 Millán, J., López-Roig, M., Delicado, V., Serra-Cobo, J., & Esperón, F. (2015). Widespread  
739 infection with hemotropic mycoplasmas in bats in Spain, including a hemoplasma closely  
740 related to “Candidatus Mycoplasma hemohominis.” *Comparative Immunology,*  
741 *Microbiology and Infectious Diseases*, 39, 9–12. doi: 10.1016/j.cimid.2015.01.002
- 742 Monteiro, L. R., & Nogueira, M. R. (2011). Evolutionary patterns and processes in the radiation  
743 of phyllostomid bats. *BMC Evolutionary Biology*, 11, 137. doi: 10.1186/1471-2148-11-  
744 137
- 745 Mühldorfer, K. (2013). Bats and Bacterial Pathogens: A Review. *Zoonoses and Public Health*,  
746 60(1), 93–103. doi: 10.1111/j.1863-2378.2012.01536.x
- 747 Museux, K., Boretti, F. S., Willi, B., Riond, B., Hoelzle, K., Hoelzle, L. E., ... Hofmann-  
748 Lehmann, R. (2009). In vivo transmission studies of “Candidatus Mycoplasma

- 749 turicensis” in the domestic cat. *Veterinary Research*, 40(5), 1, 45–14. doi:  
750 10.1051/vetres/2009028
- 751 Myhrvold, N. P., Baldrige, E., Chan, B., Sivam, D., Freeman, D. L., & Ernest, S. K. M. (2015).  
752 An amniote life-history database to perform comparative analyses with birds, mammals,  
753 and reptiles. *Ecology*, 96(11), 3109–3109. doi: 10.1890/15-0846R.1
- 754 Nishiura, H., Hoyer, B., Klaassen, M., Bauer, S., & Heesterbeek, H. (2009). How to find natural  
755 reservoir hosts from endemic prevalence in a multi-host population: a case study of  
756 influenza in waterfowl. *Epidemics*, 1(2), 118–128. doi: 10.1016/j.epidem.2009.04.002
- 757 Olival, K. J., Hosseini, P. R., Zambrana-Torrel, C., Ross, N., Bogich, T. L., & Daszak, P.  
758 (2017). Host and viral traits predict zoonotic spillover from mammals. *Nature*,  
759 546(7660), 646–650. doi: 10.1038/nature22975
- 760 Paradis, E., Claude, J., & Strimmer, K. (2004). APE: analyses of phylogenetics and evolution in  
761 R language. *Bioinformatics*, 20(2), 289–290.
- 762 Parrish, C. R., Holmes, E. C., Morens, D. M., Park, E.-C., Burke, D. S., Calisher, C. H., ...  
763 Daszak, P. (2008). Cross-Species Virus Transmission and the Emergence of New  
764 Epidemic Diseases. *Microbiology and Molecular Biology Reviews*, 72(3), 457–470. doi:  
765 10.1128/MMBR.00004-08
- 766 Pedersen, A. B., Altizer, S., Poss, M., Cunningham, A. A., & Nunn, C. L. (2005). Patterns of  
767 host specificity and transmission among parasites of wild primates. *International Journal*  
768 *for Parasitology*, 35(6), 647–657.
- 769 Pitcher, D. G., & Nicholas, R. A. J. (2005). Mycoplasma host specificity: Fact or fiction? *The*  
770 *Veterinary Journal*, 170(3), 300–306. doi: 10.1016/j.tvjl.2004.08.011

- 771 Plowright, R. K., Parrish, C. R., McCallum, H., Hudson, P. J., Ko, A. I., Graham, A. L., &  
772 Lloyd-Smith, J. O. (2017). Pathways to zoonotic spillover. *Nature Reviews Microbiology*,  
773 *15*(8), 502–510.
- 774 Reid, F. (1997). *A Field Guide to the Mammals of Central America and Southeast Mexico*. OUP  
775 USA.
- 776 Santana, S. E., Dial, T. O., Eiting, T. P., & Alfaro, M. E. (2011). Roosting Ecology and the  
777 Evolution of Pelage Markings in Bats. *PLOS ONE*, *6*(10), e25845. doi:  
778 10.1371/journal.pone.0025845
- 779 Schmidt John Paul, Maher Sean, Drake John M., Huang Tao, Farrell Maxwell J., & Han Barbara  
780 A. (2019). Ecological indicators of mammal exposure to Ebolavirus. *Philosophical*  
781 *Transactions of the Royal Society B: Biological Sciences*, *374*(1782), 20180337. doi:  
782 10.1098/rstb.2018.0337
- 783 Sikes, R. S., Care, A., & Mammalogists, U. C. of the A. S. of. (2016). 2016 Guidelines of the  
784 American Society of Mammalogists for the use of wild mammals in research and  
785 education. *Journal of Mammalogy*, *97*(3), 663–688.
- 786 Soto, F., Walker, R., Sepulveda, M., Bittencourt, P., Acosta-Jamett, G., & Müller, A. (2017).  
787 Occurrence of canine hemotropic mycoplasmas in domestic dogs from urban and rural  
788 areas of the Valdivia Province, southern Chile. *Comparative Immunology, Microbiology*  
789 *and Infectious Diseases*, *50*, 70–77. doi: 10.1016/j.cimid.2016.11.013
- 790 Streicker, D. G., Recuenco, S., Valderrama, W., Benavides, J. G., Vargas, I., Pacheco, V., ...  
791 Altizer, S. (2012). Ecological and anthropogenic drivers of rabies exposure in vampire  
792 bats: implications for transmission and control. *Proc. R. Soc. B*, *279*(1742), 3384–3392.  
793 doi: 10.1098/rspb.2012.0538

- 794 Streicker, D. G., Turmelle, A. S., Vonhof, M. J., Kuzmin, I. V., McCracken, G. F., & Rupprecht,  
795 C. E. (2010). Host phylogeny constrains cross-species emergence and establishment of  
796 rabies virus in bats. *Science*, 329(5992), 676–679.
- 797 Ter Hofstede, H. M., Fenton, M. B., & Whitaker, J. O. (2004). Host and host-site specificity of  
798 bat flies (Diptera: Streblidae and Nycteribiidae) on Neotropical bats (Chiroptera).  
799 *Canadian Journal of Zoology*, 82(4), 616–626.
- 800 VanderWaal, K. L., Atwill, E. R., Isbell, L. A., & McCowan, B. (2014). Quantifying microbe  
801 transmission networks for wild and domestic ungulates in Kenya. *Biological*  
802 *Conservation*, 169(Supplement C), 136–146. doi: 10.1016/j.biocon.2013.11.008
- 803 VanderWaal, K. L., & Ezenwa, V. O. (2016). Heterogeneity in pathogen transmission:  
804 mechanisms and methodology. *Functional Ecology*, 30(10), 1606–1622.
- 805 Viana, M., Mancy, R., Biek, R., Cleaveland, S., Cross, P. C., Lloyd-Smith, J. O., & Haydon, D.  
806 T. (2014). Assembling evidence for identifying reservoirs of infection. *Trends in Ecology*  
807 *& Evolution*, 29(5), 270–279. doi: 10.1016/j.tree.2014.03.002
- 808 Viechtbauer, W. (2010). Conducting meta-analyses in R with the metafor package. *Journal of*  
809 *Statistical Software*, 36(3), 1–48.
- 810 Voigt, C. C., von Helversen, O., Michener, R., & Kunz, T. H. (2001). The economics of harem  
811 maintenance in the sac-winged bat, *Saccopteryx bilineata* (Emballonuridae). *Behavioral*  
812 *Ecology and Sociobiology*, 50(1), 31–36.
- 813 Volokhov, D. V., Becker, D. J., Bergner, L. M., Camus, M. S., Orton, R. J., Chizhikov, V. E., ...  
814 Streicker, D. G. (2017). Novel hemotropic mycoplasmas are widespread and genetically  
815 diverse in vampire bats. *Epidemiology & Infection*, 145(15), 3154–3167.

- 816 Volokhov, Dmitriy V., Hwang, J., Chizhikov, V. E., Danaceau, H., & Gottdenker, N. L. (2017).  
817 Prevalence, Genotype Richness, and Coinfection Patterns of Hemotropic Mycoplasmas in  
818 Raccoons (*Procyon lotor*) on Environmentally Protected and Urbanized Barrier Islands.  
819 *Applied and Environmental Microbiology*, 83(9). doi: 10.1128/AEM.00211-17
- 820 Volokhov, Dmitriy V., Kong, H., George, J., Anderson, C., & Chizhikov, V. E. (2008).  
821 Biological enrichment of Mycoplasma agents by cocultivation with permissive cell  
822 cultures. *Applied and Environmental Microbiology*, 74(17), 5383–5391. doi:  
823 10.1128/AEM.00720-08
- 824 Volokhov, Dmitriy V., Norris, T., Rios, C., Davidson, M. K., Messick, J. B., Gulland, F. M., &  
825 Chizhikov, V. E. (2011). Novel hemotropic mycoplasma identified in naturally infected  
826 California sea lions (*Zalophus californianus*). *Veterinary Microbiology*, 149(1–2), 262–  
827 268. doi: 10.1016/j.vetmic.2010.10.026
- 828 Volokhov, Dmitriy V., Simonyan, V., Davidson, M. K., & Chizhikov, V. E. (2012). RNA  
829 polymerase beta subunit (rpoB) gene and the 16S–23S rRNA intergenic transcribed  
830 spacer region (ITS) as complementary molecular markers in addition to the 16S rRNA  
831 gene for phylogenetic analysis and identification of the species of the family  
832 Mycoplasmataceae. *Molecular Phylogenetics and Evolution*, 62(1), 515–528.
- 833 Walker Vergara, R., Morera Galleguillos, F., Gómez Jaramillo, M., Pereira Almosny, N. R.,  
834 Arauna Martínez, P., Grob Behne, P., ... Müller, A. (2016). Prevalence, risk factor  
835 analysis, and hematological findings of hemoplasma infection in domestic cats from  
836 Valdivia, Southern Chile. *Comparative Immunology, Microbiology and Infectious*  
837 *Diseases*, 46, 20–26. doi: 10.1016/j.cimid.2016.03.004

- 838 Washburne, A. D., Silverman, J. D., Morton, J. T., Becker, D. J., Crowley, D., Mukherjee, S., ...  
839 Plowright, R. K. (2019). Phylofactorization: a graph partitioning algorithm to identify  
840 phylogenetic scales of ecological data. *Ecological Monographs*, 0(0), e01353. doi:  
841 10.1002/ecm.1353
- 842 Webber, Q. M. R., Fletcher, Q. E., & Willis, C. K. R. (2017). Viral Richness is Positively  
843 Related to Group Size, but Not Mating System, in Bats. *EcoHealth*, 1–10. doi:  
844 10.1007/s10393-017-1276-3
- 845 Wetterer, A. L., Rockman, M. V., & Simmons, N. B. (2000). Phylogeny of phyllostomid bats  
846 (mammalia: chiroptera): data from diverse morphological systems, sex chromosomes,  
847 and restriction sites. *Bulletin of the American Museum of Natural History*, 1–200. doi:  
848 10.1206/0003-0090(2000)248<0001:POPBMC>2.0.CO;2
- 849 Willi, B., Boretti, F. S., Meli, M. L., Bernasconi, M. V., Casati, S., Hegglin, D., ... Hofmann-  
850 Lehmann, R. (2007). Real-time PCR investigation of potential vectors, reservoirs, and  
851 shedding patterns of feline hemotropic mycoplasmas. *Applied and Environmental*  
852 *Microbiology*, 73(12), 3798–3802. doi: 10.1128/AEM.02977-06
- 853 Willi, B., Boretti, F. S., Tasker, S., Meli, M. L., Wengi, N., Reusch, C. E., ... Hofmann-  
854 Lehmann, R. (2007). From Haemobartonella to hemoplasma: Molecular methods provide  
855 new insights. *Veterinary Microbiology*, 125(3–4), 197–209. doi:  
856 10.1016/j.vetmic.2007.06.027
- 857 Wilman, H., Belmaker, J., Simpson, J., de la Rosa, C., Rivadeneira, M. M., & Jetz, W. (2014).  
858 EltonTraits 1.0: Species-level foraging attributes of the world's birds and mammals.  
859 *Ecology*, 95(7), 2027–2027. doi: 10.1890/13-1917.1

- 860 Withenshaw, S. M., Devevey, G., Pedersen, A. B., & Fenton, A. (2016). Multihost Bartonella  
861 parasites display covert host specificity even when transmitted by generalist vectors.  
862 *Journal of Animal Ecology*, 85(6), 1442–1452.
- 863 Woolhouse, M. E. J., & Gowtage-Sequeria, S. (2005). Host Range and Emerging and  
864 Reemerging Pathogens. *Emerging Infectious Diseases*, 11(12), 1842–1847. doi:  
865 10.3201/eid1112.050997
- 866 Woolhouse, M. E., Taylor, L. H., & Haydon, D. T. (2001). Population biology of multihost  
867 pathogens. *Science*, 292(5519), 1109–1112.
- 868 Wright, E. S., Yilmaz, L. S., & Noguera, D. R. (2012). DECIPHER, a Search-Based Approach to  
869 Chimera Identification for 16S rRNA Sequences. *Applied and Environmental*  
870 *Microbiology*, 78(3), 717–725. doi: 10.1128/AEM.06516-11
- 871
- 872



873 **Tables**

874 Table 1. Competing PGLS models predicting hemoplasma infection prevalence (logit-  
875 transformed) across the Belize bat community ( $n=33$  species). Models are ranked by  $\Delta\text{AICc}$  with  
876 the number of coefficients ( $k$ ), Akaike weights ( $w_i$ ), and a likelihood ratio test pseudo- $R^2$ .

| <b>Model structure</b>              | <b><math>k</math></b> | <b><math>\Delta\text{AICc}</math></b> | <b><math>w_i</math></b> | <b><math>R^2</math></b> |
|-------------------------------------|-----------------------|---------------------------------------|-------------------------|-------------------------|
| ~ log body mass                     | 2                     | 0.00                                  | 0.40                    | 0.24                    |
| ~ maximum colony size               | 2                     | 1.71                                  | 0.17                    | 0.20                    |
| ~ roost type                        | 2                     | 2.82                                  | 0.10                    | 0.18                    |
| ~ foraging strata                   | 3                     | 2.88                                  | 0.09                    | 0.24                    |
| ~ roost flexibility                 | 2                     | 3.56                                  | 0.07                    | 0.16                    |
| ~ percent plants in diet            | 2                     | 4.30                                  | 0.05                    | 0.14                    |
| ~ dietary guild                     | 3                     | 5.46                                  | 0.03                    | 0.17                    |
| ~ log evolutionary distinctiveness  | 2                     | 5.50                                  | 0.02                    | 0.11                    |
| ~ log aspect ratio                  | 2                     | 5.61                                  | 0.02                    | 0.10                    |
| ~ log annual fecundity              | 2                     | 6.13                                  | 0.02                    | 0.09                    |
| ~ square-root geographic range size | 2                     | 6.27                                  | 0.02                    | 0.08                    |
| ~ 1 (intercept only)                | 1                     | 6.77                                  | 0.01                    | 0.00                    |
| ~ sample size                       | 2                     | 8.38                                  | 0.01                    | 0.02                    |

877

878 Table 2. Hemoplasma genotypes identified from the Belize bat community. Genotypes are given  
 879 with their bat host species, representative GenBank numbers, and intra-genotype variability.

| Genotype                               | Host species                                                                                   | Representative GenBank number | Intra-genotype sequence variability |
|----------------------------------------|------------------------------------------------------------------------------------------------|-------------------------------|-------------------------------------|
| VBG1                                   | <i>Desmodus rotundus</i> , <i>Pteronotus fulvus</i> ***                                        | KY932701                      | 99.8                                |
| VBG2                                   | <i>Desmodus rotundus</i>                                                                       | KY932678                      | 99.9                                |
| VBG3                                   | <i>Desmodus rotundus</i>                                                                       | KY932722                      | 99.6                                |
| CS1**                                  | <i>Carollia sowelli</i>                                                                        | MK353833                      | 100                                 |
| CS2**                                  | <i>Carollia sowelli</i> , <i>C. perspicillata</i>                                              | MH245134                      | 99.7                                |
| MR1**                                  | <i>Molossus rufus</i>                                                                          | MH245174                      | 99.7                                |
| MR2**                                  | <i>Molossus rufus</i>                                                                          | MH245151                      | NA*                                 |
| PPM**                                  | <i>Pteronotus mesoamericanus</i> , <i>P. fulvus</i> ***                                        | MH245159                      | 99.9                                |
| EF1**                                  | <i>Eptesicus furinalis</i> , <i>Saccopteryx bilineata</i> ***, <i>Glossophaga soricina</i> *** | MH245147                      | 99.6                                |
| EF2**                                  | <i>Eptesicus furinalis</i>                                                                     | MH245131                      | 99.9                                |
| NM**                                   | <i>Natalus mexicanus</i> ***                                                                   | MK353818                      | NA*                                 |
| LE**                                   | <i>Lophostoma evotis</i>                                                                       | MK353892                      | 99.9                                |
| TC1**                                  | <i>Trachops cirrhosus</i>                                                                      | MH245145                      | 99.8                                |
| TC2**                                  | <i>Trachops cirrhosus</i>                                                                      | MK353860                      | 99.8                                |
| APH1**                                 | <i>Dermanura phaeotis</i> , <i>D. watsoni</i> , <i>A. lituratus</i> ***                        | MH245132                      | 100                                 |
| APH2**                                 | <i>Artibeus jamaicensis</i> , <i>A. lituratus</i> , <i>A. intermedius</i>                      | MH245187                      | 99.9                                |
| APH3**                                 | <i>Artibeus intermedius</i>                                                                    | MH245186                      | 99.8                                |
| GLS**                                  | <i>Glossophaga soricina</i>                                                                    | MK353874                      | 99.5                                |
| MYE**                                  | <i>Myotis elegans</i> , <i>Myotis keaysi</i> ***                                               | MK353840                      | 100                                 |
| MYK**                                  | <i>Myotis keaysi</i> ***                                                                       | MH245153                      | NA*                                 |
| UB**                                   | <i>Uroderma convexum</i>                                                                       | MK353869                      | 99.8                                |
| PLU**                                  | <i>Platyrrhinus helleri</i> ***, <i>Uroderma convexum</i> ***                                  | MK353883                      | 99.6                                |
| SP**                                   | <i>Sturnira parvidens</i> ; <i>A. lituratus</i> ***                                            | MH245168                      | 99.5                                |
| RHN**                                  | <i>Rhynchonycteris naso</i> ***                                                                | MK353871                      | NA*                                 |
| <i>M. moatsii</i> -like<br>1****       | <i>Pteronotus mesoamericanus</i> ***                                                           | MK353864                      | NA*                                 |
| <i>M. moatsii</i> -like<br>2****       | <i>Myotis keaysi</i> ***                                                                       | MK353862                      | NA*                                 |
| <i>M. moatsii</i> -like<br>3****       | <i>Rhynchonycteris naso</i> ***                                                                | MH245146                      | NA*                                 |
| <i>M. lagogenitalium</i> -like<br>**** | <i>Glossophaga soricina</i> ***                                                                | MH245140                      | NA*                                 |
| <i>M. muris</i> -like****              | <i>Saccopteryx bilineata</i> ***                                                               | MH245138                      | NA*                                 |

880 \* Intra-genotype sequence variability could not be assessed, as only one sequence was identified

881 \*\* Novel hemoplasma genotypes

882 \*\*\* Genotypes were detected in only one individual of these bat species

883 \*\*\*\* Non-hemoplasma *Mycoplasma* genotypes

884

885 **Figures and legends**

886 Figure 1. Study sites in northern Belize. The shaded inset shows the location of Orange Walk  
887 District. Borders show the boundaries of the LAR (Lamanai Archaeological Reserve) and KK  
888 (Ka'Kabish). White and tan shading indicates agricultural and urban development, while dark  
889 green shading represents intact forest. Satellite imagery was derived from Google Maps. Stacked  
890 bar plots display the relative abundance of each sampled bat family per study site.

891

892 Figure 2. Predictors of hemoplasma infection status. (A) Odds ratios and 95% HDIs from the  
893 phylogenetic GLMM. Estimates that do not overlap with 1 (dashed line) are displayed in black.  
894 Prevalence and 95% confidence intervals are stratified by (B) bat sex and (C) site per year.

895

896 Figure 3. Predictors of species-level hemoplasma prevalence across the Belize bat community.  
897 (A) Clades with significantly different prevalence are highlighted. (B) Results from the top  
898 PGLS models predicting prevalence as a function of mass and colony size. Model fit and 95%  
899 confidence intervals are shown overlaid with data scaled by sample size; species from the clade  
900 identified through phylogenetic factorization are colored as in panel A. Species identified  
901 through phylogenetic factorization (*Saccopteryx bilineata* and *Rhynchonycteris naso*) and with  
902 larger body mass, colony size, and hemoplasma prevalence (*Desmodus rotundus*, *Molossus*  
903 *rufus*, and *Pteronotus mesoamericanus*) are shown to the right (photographs by Brock Fenton).

904

905

906 Figure 4. Evolutionary relationships between Belize bats and hemoplasma genotypes. The  
907 cophylogeny plot shows the bat phylogeny on the left and the hemoplasma genotype phylogeny  
908 on the right. Lines display bat–hemoplasma associations and are shaded by the inverse of  
909 squared residuals from PACo (i.e., small residuals more indicative of coevolution are dark).

910

911 Figure 5. Patterns of hemoplasma genotype sharing across the Belize bat community. (A) Nodes  
912 in the genotype network represent bat species (abbreviated by Latin binomials), and edges  
913 represent a shared genotype. Nodes are colored by communities identified with the Louvain  
914 method and are scaled by the number of individuals per species. (B) The matrix shows pairwise  
915 hemoplasma genotype sharing, colored by the number of genotypes shared between bat species.

916

917 Figure 6. Phylogenetic patterns in hemoplasma genotype networks for Belize bat species (A)  
918 degree and (B) eigenvector centrality. Clades showing significantly different centrality metrics  
919 are highlighted, and points are scaled by observed values. Results from the top PGLS models  
920 predicting both centrality metrics as a function of bat species traits (C–D). Model fit and 95%  
921 confidence intervals are shown overlaid with data scaled by sample size; species from the clades  
922 identified through phylogenetic factorization are colored as in panels A–B.

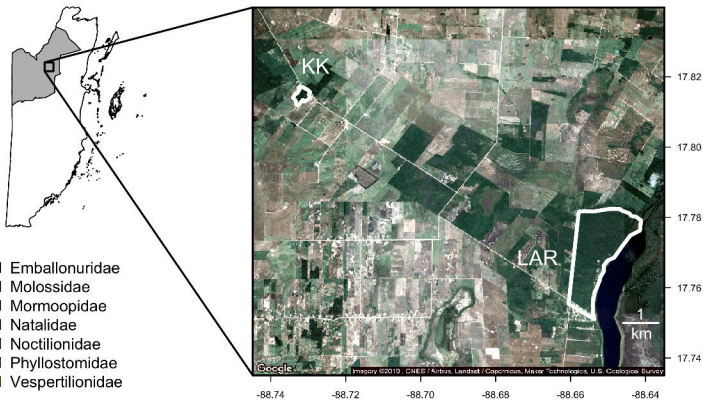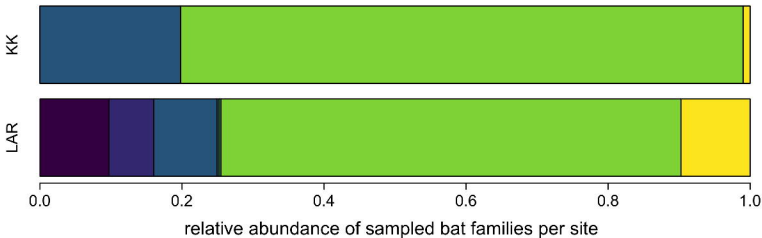

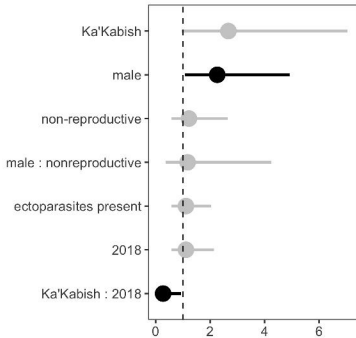

(A) odds of hemoplasma infection

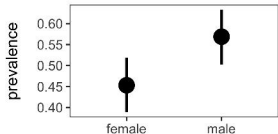

(B) bat sex

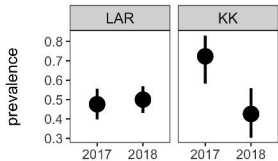

(C) sampling year

(A) prevalence

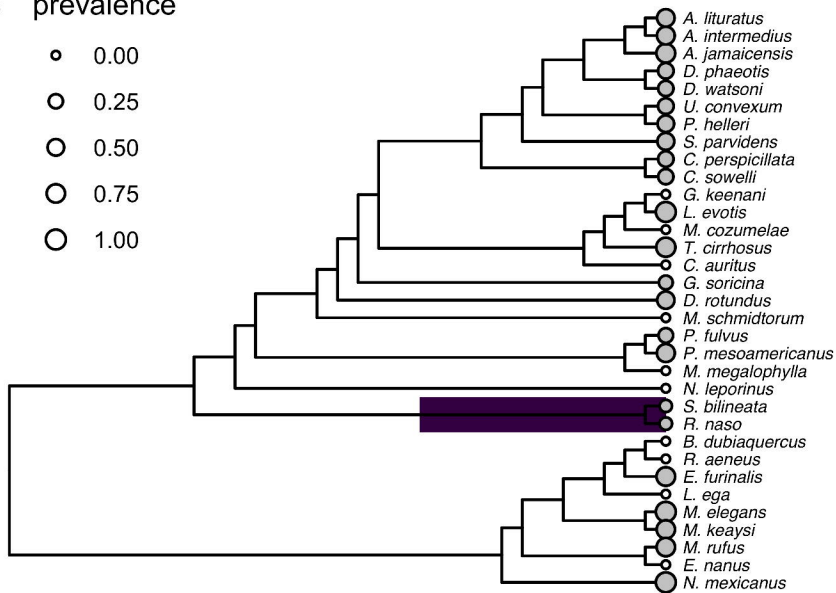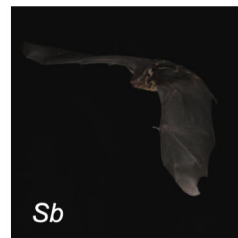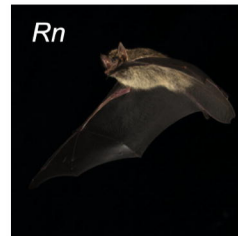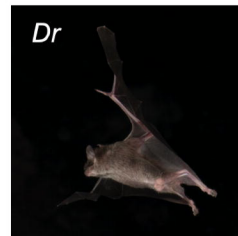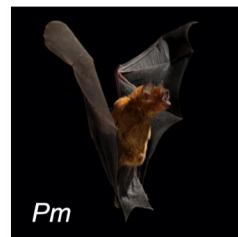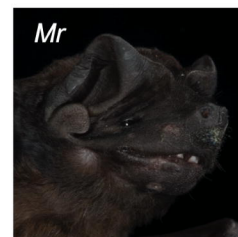

(B)

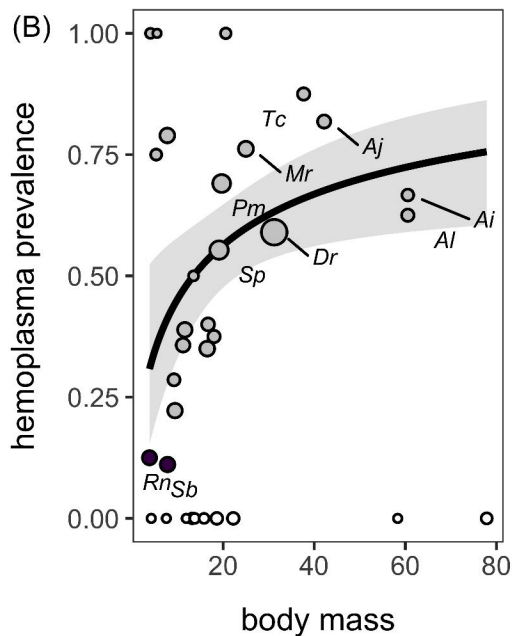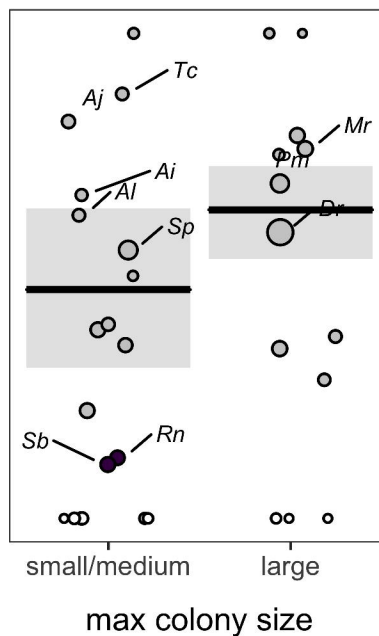



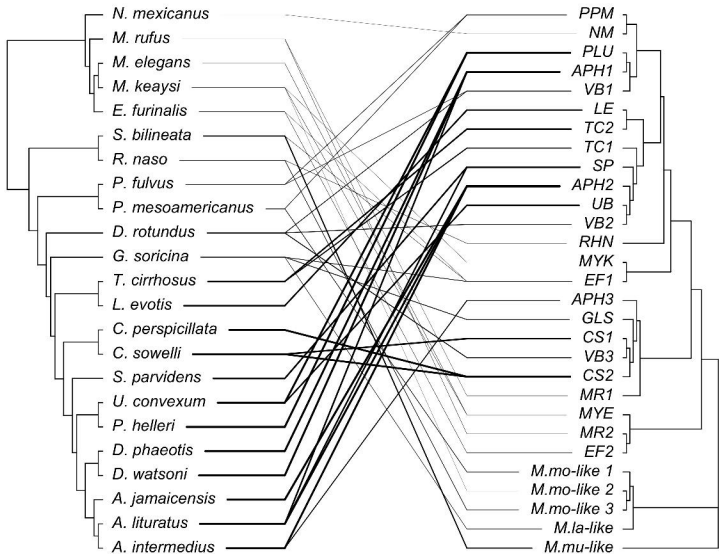



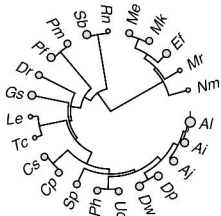

(A) degree

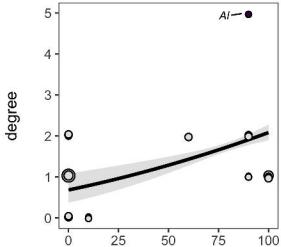

(C) percent plants in diet

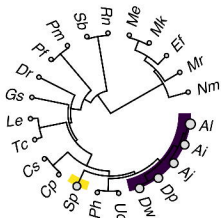

(B) eigenvector centrality

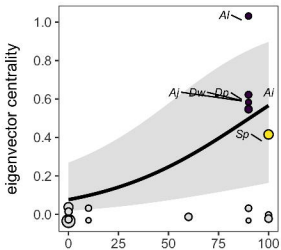

(D) percent plants in diet
